# Supplementary material for: SO3H-functionalized Brønsted acidic ionic liquids as efficient catalysts for the synthesis of isoamyl salicylate
Source: Royal Society of Chemistry journal article supplement (doi:10.1039/c3ra45921g), 2013-11-06
Supplement: c3ra45921g.pdf [file c3ra45921g.pdf]

## Electronic Supplementary Information

### SO<sub>3</sub>H-Functionalized Brønsted Acidic Ionic Liquids as Efficient Catalysts for the Synthesis of Isoamyl Salicylate

Duan-Jian Tao,\* Jing Wu, Zhen-Zhen Wang, Zhang-Hui Lu, Zhen Yang and Xiang-Shu Chen\*

Jiangxi Inorganic Membrane Materials Engineering Research Centre, College of Chemistry and Chemical Engineering, Jiangxi Normal University, Nanchang 330022, People's Republic of China

\*Corresponding Author: Tel.: +86-791-88120533. Fax: +86-791-88120843. E-mail: djtao@jxnu.edu.cn (D.-J. Tao), cxs66cn@jxnu.edu.cn (X.-S. Chen)

#### 1. The fully optimized geometries of BAILs

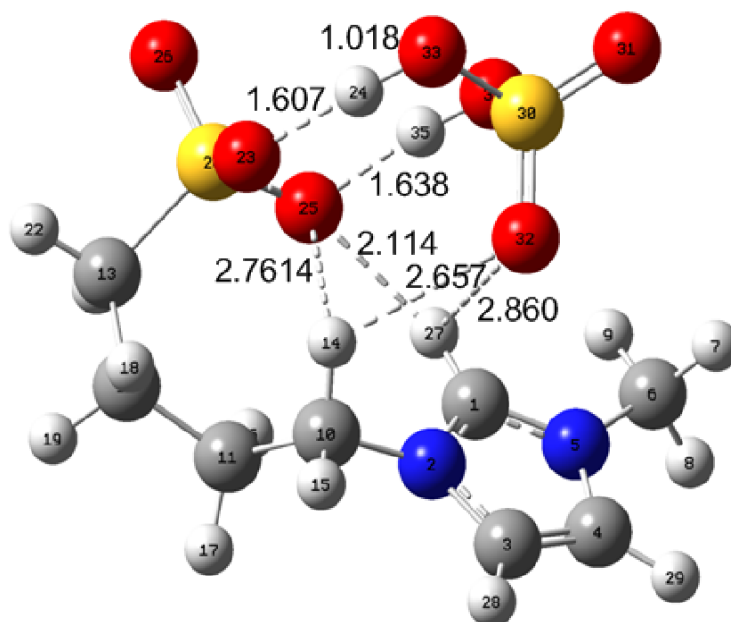

Figure S1. [BSmim][HSO<sub>4</sub>]

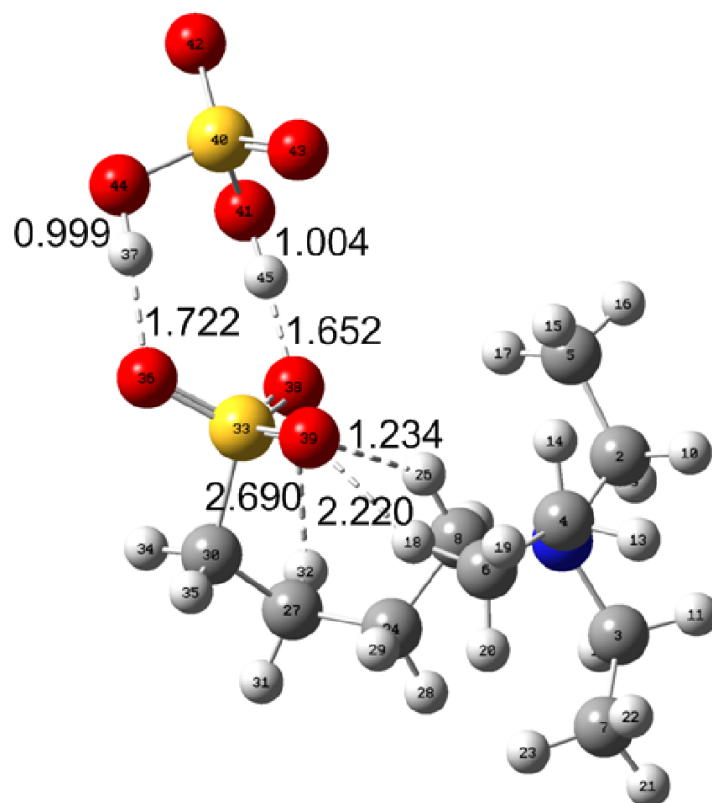

Figure S2. [BSEt<sub>3</sub>N][HSO<sub>4</sub>]

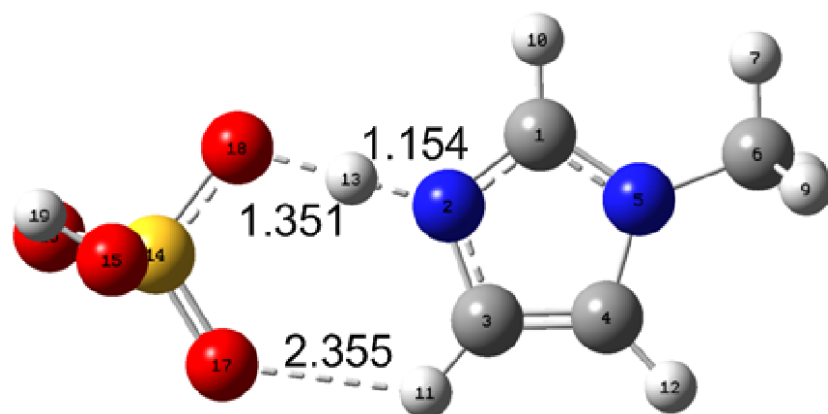

Figure S3. [Hmim][HSO<sub>4</sub>]

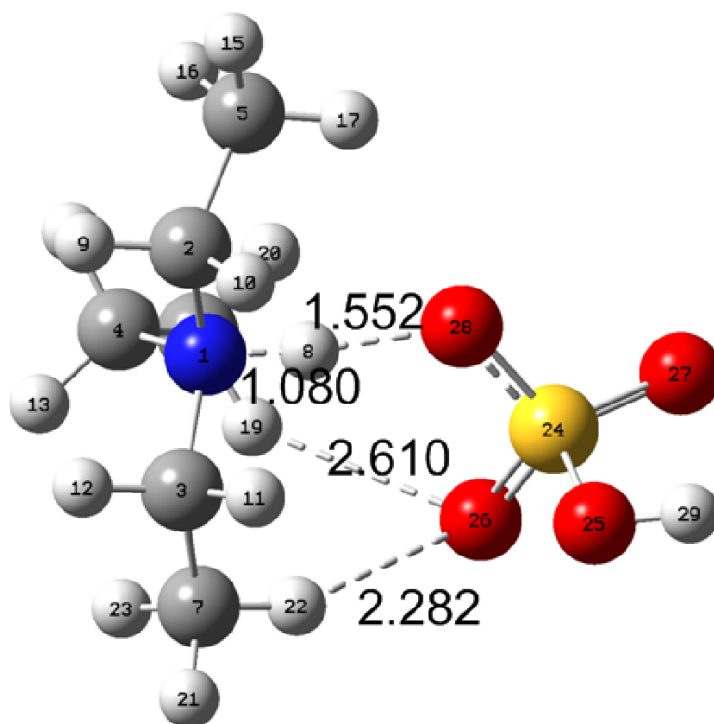

**Figure S4.** [Et<sub>3</sub>NH][HSO<sub>4</sub>]

## 2. Molecular coordinates

### [BSmim][HSO<sub>4</sub>]:

|   |             |             |             |
|---|-------------|-------------|-------------|
| C | -1.60468300 | -1.14581200 | 0.61359500  |
| N | -1.36446400 | -1.83745100 | -0.50384600 |
| C | -2.57354400 | -2.22366200 | -1.04855200 |
| C | -3.55560100 | -1.75987500 | -0.22275000 |
| N | -2.92551400 | -1.09392900 | 0.81544400  |
| C | -3.58396900 | -0.32055000 | 1.87112800  |
| H | -4.03708800 | 0.57389800  | 1.43807300  |
| H | -4.34501900 | -0.93539600 | 2.35496800  |
| H | -2.83600100 | -0.02028200 | 2.60445400  |
| C | -0.02090000 | -1.96055700 | -1.10797300 |
| C | 0.92997700  | -2.83223300 | -0.27264800 |
| C | 2.41134800  | -2.54326300 | -0.60564500 |
| C | 3.12885100  | -1.57847000 | 0.34647600  |
| H | 0.36294300  | -0.94523600 | -1.22122500 |
| H | -0.16692300 | -2.37915600 | -2.10650400 |
| H | 0.75623100  | -2.64163900 | 0.79107000  |
| H | 0.69980100  | -3.88920900 | -0.44907400 |
| H | 2.50460600  | -2.17021300 | -1.63203500 |
| H | 2.97590600  | -3.48214800 | -0.56924700 |
| S | 2.48173600  | 0.12088700  | 0.48055900  |
| H | 3.13591100  | -1.95096000 | 1.37552700  |

|   |             |             |             |
|---|-------------|-------------|-------------|
| H | 4.16554600  | -1.43418900 | 0.03094800  |
| O | 2.19465200  | 0.55837400  | -0.93850100 |
| H | 1.26480700  | 1.85187600  | -1.15221400 |
| O | 1.16335800  | 0.00933500  | 1.24319700  |
| O | 3.50827900  | 0.89578200  | 1.18942700  |
| H | -0.83310500 | -0.68500700 | 1.21467500  |
| H | -2.63384100 | -2.78277000 | -1.96833800 |
| H | -4.62880900 | -1.84022500 | -0.28512800 |
| S | -0.73959300 | 2.38161100  | -0.47653800 |
| O | -1.53636600 | 3.58847600  | -0.55255900 |
| O | -1.30190700 | 1.10986500  | -0.96265000 |
| O | 0.64407800  | 2.65673000  | -1.20805800 |
| O | -0.33539200 | 2.18206200  | 1.06763200  |
| H | 0.28807400  | 1.39189300  | 1.17883600  |

**[BSEt<sub>3</sub>][HSO<sub>4</sub>]:**

|   |             |             |             |
|---|-------------|-------------|-------------|
| N | -3.09177200 | -1.04257000 | -0.13220000 |
| C | -2.60223600 | -2.42847100 | -0.61727400 |
| C | -4.49046000 | -0.88648900 | -0.72820500 |
| C | -3.11933300 | -1.10732500 | 1.40365100  |
| C | -1.12976300 | -2.75768400 | -0.39208400 |
| C | -3.10171800 | 0.19510800  | 2.19553400  |
| C | -5.44850700 | 0.11014100  | -0.08333300 |
| C | -2.09076400 | -0.02214600 | -0.69620500 |
| H | -2.83695400 | -2.45869100 | -1.68461600 |
| H | -3.24472300 | -3.15250700 | -0.10822600 |
| H | -4.94164800 | -1.88134800 | -0.68429500 |
| H | -4.33025600 | -0.64449600 | -1.78210600 |
| H | -3.99782900 | -1.71511500 | 1.64077900  |
| H | -2.23364200 | -1.67653000 | 1.68226800  |
| H | -0.83276900 | -2.73577000 | 0.65872500  |
| H | -0.97799200 | -3.78142500 | -0.74927000 |
| H | -0.45000800 | -2.10730100 | -0.94406800 |
| H | -2.15621100 | 0.72360000  | 2.06051900  |
| H | -3.16435200 | -0.08916100 | 3.25164600  |
| H | -3.94285500 | 0.85567800  | 1.98391000  |
| H | -6.36683300 | 0.09918400  | -0.67943200 |
| H | -5.72084700 | -0.17682000 | 0.93440500  |
| H | -5.07151600 | 1.13216100  | -0.07346400 |
| C | -2.47673200 | 1.45895400  | -0.76994000 |
| H | -1.88039000 | -0.37319400 | -1.70978700 |
| H | -1.19531700 | -0.15107300 | -0.09788000 |
| C | -1.32727600 | 2.29327900  | -1.39704500 |
| H | -3.35501600 | 1.58566000  | -1.41259200 |
| H | -2.72450300 | 1.86449300  | 0.21297600  |
| C | -0.18134700 | 2.75350500  | -0.48186700 |
| H | -1.77549300 | 3.20624300  | -1.80717000 |

|   |             |             |             |
|---|-------------|-------------|-------------|
| H | -0.90006900 | 1.75014700  | -2.24735800 |
| S | 0.79524500  | 1.40954700  | 0.27260200  |
| H | 0.53241800  | 3.34352700  | -1.06268700 |
| H | -0.53768200 | 3.36408000  | 0.35319800  |
| O | 2.08307600  | 2.02210300  | 0.70664200  |
| H | 3.55695600  | 1.13155300  | 0.69001300  |
| O | 0.96695200  | 0.40985400  | -0.85012500 |
| O | -0.04833000 | 0.87637800  | 1.37974300  |
| S | 4.11811500  | -0.85767700 | 0.02250800  |
| O | 3.35452800  | -0.62627600 | -1.37609000 |
| O | 5.40504700  | -1.44587900 | -0.29149400 |
| O | 3.19575900  | -1.50698900 | 0.95338900  |
| O | 4.41162700  | 0.64148000  | 0.52462100  |
| H | 2.43573700  | -0.26341000 | -1.19472700 |

**[Hmim][HSO<sub>4</sub>]:**

|   |             |             |             |
|---|-------------|-------------|-------------|
| C | -2.17038600 | -0.94216100 | -0.03981200 |
| N | -1.04817500 | -0.23627500 | -0.07395700 |
| C | -1.37379000 | 1.09965000  | -0.03771200 |
| C | -2.73798800 | 1.19217600  | 0.01951900  |
| N | -3.22675500 | -0.10533000 | 0.01773600  |
| C | -4.63358300 | -0.49499500 | 0.06909200  |
| H | -4.70118300 | -1.58325100 | 0.04929000  |
| H | -5.16613700 | -0.08861700 | -0.79391000 |
| H | -5.09110900 | -0.12548600 | 0.98981400  |
| H | -2.23973400 | -2.01913000 | -0.05555400 |
| H | -0.59599900 | 1.84816100  | -0.05651500 |
| H | -3.39428800 | 2.04691200  | 0.06116700  |
| H | 0.02986700  | -0.64603800 | -0.12420100 |
| S | 2.34519400  | -0.00264100 | -0.11783300 |
| O | 2.93829300  | -0.12466500 | 1.42923100  |
| O | 3.48591000  | -0.25796100 | -1.00065800 |
| O | 1.69735100  | 1.31871600  | -0.14085600 |
| O | 1.29601400  | -1.11362900 | -0.19277600 |
| H | 3.71393800  | -0.70676200 | 1.38273200  |

**[Et<sub>3</sub>NH][HSO<sub>4</sub>]:**

|   |             |             |             |
|---|-------------|-------------|-------------|
| N | -1.63191600 | 0.05241400  | -0.28665900 |
| C | -2.26104900 | -1.12225000 | -0.99664400 |
| C | -1.54328400 | 1.23215900  | -1.22889500 |
| C | -2.33130200 | 0.38285900  | 1.01839400  |
| C | -2.08665900 | -2.44137300 | -0.25050200 |
| C | -1.36957600 | 0.45573800  | 2.20052900  |
| C | -0.88926500 | 2.47306400  | -0.63136900 |
| H | -0.61628300 | -0.26124400 | -0.09503400 |
| H | -3.31643200 | -0.87684200 | -1.15880700 |

|   |             |             |             |
|---|-------------|-------------|-------------|
| H | -1.77077900 | -1.18324200 | -1.97113000 |
| H | -0.95806200 | 0.87979300  | -2.08203700 |
| H | -2.56351400 | 1.43867900  | -1.57221300 |
| H | -2.86084400 | 1.32743900  | 0.87361500  |
| H | -3.08762400 | -0.38587700 | 1.18745800  |
| H | -2.52097600 | -3.24281200 | -0.85589200 |
| H | -2.59724800 | -2.44983300 | 0.71701000  |
| H | -1.02741000 | -2.65869600 | -0.09396700 |
| H | -1.92530500 | 0.76423600  | 3.09169300  |
| H | -0.55608600 | 1.16423000  | 2.02776000  |
| H | -0.91566500 | -0.51909600 | 2.39816600  |
| H | -0.79534100 | 3.21941300  | -1.42633500 |
| H | 0.10981000  | 2.25439200  | -0.24460400 |
| H | -1.48975600 | 2.92037600  | 0.16591500  |
| S | 2.03746500  | -0.19473900 | 0.14216700  |
| O | 2.49313600  | 0.23884900  | -1.41149400 |
| O | 1.75619700  | 1.08561800  | 0.81836300  |
| O | 3.14518500  | -1.01594500 | 0.64626000  |
| O | 0.76205100  | -0.97516300 | -0.09485500 |
| H | 3.34974400  | -0.19004900 | -1.56493200 |
